# Supplementary material for: Preparation of nanostructured CeCO3OH particles from aqueous solutions and gels containing biological polymers and their thermal conversion to CeO2
Source: Royal Society of Chemistry journal article supplement (doi:10.1039/c3ra43580f), 2013-01-01
Supplement: c3ra43580f.pdf [file c3ra43580f.pdf]

# Preparation of nanostructured $\text{CeCO}_3\text{OH}$ particles from aqueous solutions and gels containing biological polymers and their thermal conversion to $\text{CeO}_2$

Hiroaki Uchiyama\*, Reiko Sakaue and Hiromitsu Kozuka

E-mail address: [h\\_uchi@kansai-u.ac.jp](mailto:h_uchi@kansai-u.ac.jp) (H. Uchiyama).

(a)

< Components of gelatin >

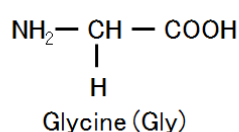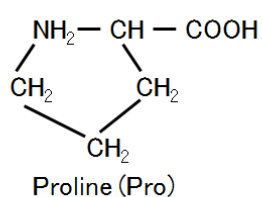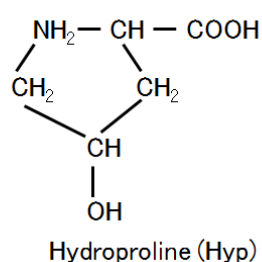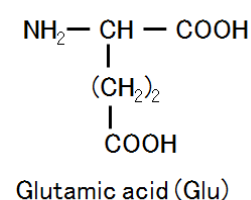

< Structure of gelatin >

e.g.)  $-\text{Gly}-\text{Pro}-\text{Hyp}-\text{Gly}-\text{Glu}-\text{Hyp}-$

(b)

< Structure of agar >

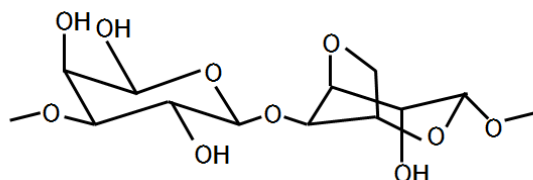

Supporting Information Figure S1. Typical structures of gelatin (a) and agar (b).\*

\*Schnepp, Z. Biopolymers as a Flexible Resource for Nanochemistry. *Angew. Chem. Int. Ed.* **2013**, 52, 1096.
